# Supplementary material for: Full Regio- and Stereoselective Protocol for the Synthesis of New Nicotinoids via Cycloaddition Processes with the Participation of Trans-Substituted Nitroethenes: Comprehensive Experimental and MEDT Study
Source: MDPI journal article supplement (doi:10.3390/molecules28083535), 2023-04-17
Supplement: s1 [file s1]

## Supplementary Material

### Full Regio- and Stereoselective Protocol for the Synthesis of New Nicotinoids via Cycloaddition Processes with the Participation of Trans-Substituted Nitroethenes: Comprehensive Experimental and MEDT Study

Jowita Kras, Przemysław Woliński, Roman Nagatsky,  
Oleg M. Demchuk and Radomir Jasiński \*

#### Contents:

|                                         |   |
|-----------------------------------------|---|
| [1] Synthetic procedures                | 2 |
| [2] Physical characteristics of adducts | 3 |
| [3] Quantum-chemical calculations       | 7 |

## [1] Synthetic procedures

### *[1.1] Z-C-(3-pyridyl)-N-methylnitrone (1)*

A solution of N-methyl-N-hydroxylamine hydrochloride (29.2 mmol), anhydrous sodium sulfate (14.1 mmol), and 3-pyridyl aldehyde (18.7 mmol), in ethanol (20 mL) was mixed at room temperature for 24 h. Sodium bicarbonate (85.71 mmol) was gradually added during stirring. The postreaction mixture was filtered. Anhydrous magnesium sulfate was added to the filtrate and filtered again. The solvent was evaporated. The isolation of the reaction product from the post-reaction mixture was performed via crystallization from ethanol. The pure product was identified on the basis of spectral data.

### *[1.2] Nitroalkenes*

Conjugated nitroalkenes were prepared by pyrolysis of respective nitroalkyl carboxylates according to known procedures [Central European Journal of Chemistry, **12**, 586-593 (2014)].

### *[1.3] [3+2] Cycloaddition between Z-C-(3-pyridyl)-N-methylnitrone and nitroalkenes: general procedure*

A solution of nitroalkene (0.02 mol) and nitrone (0.01 mol) in dry benzene (25 mL) was mixed at room temperature for 24 h (for the reaction between nitrone and 1-nitro-1-propene at 80°). The post-reaction mixture was filtered, and the solvent was evaporated in a vacuo. The residue was recrystallized from the ethanol. Pure products were identified on the basis of spectral data.

## [2] Physical characteristics of adducts

### [2.1] 3,4-cis-4,5-trans-2-methyl-3-(3-pyridyl)-4-nitro-5-trichloromethyl-1,2-oxazolidine 4a

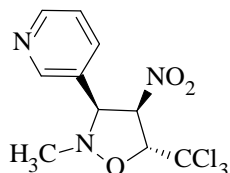

C<sub>10</sub>H<sub>10</sub>N<sub>3</sub>O<sub>3</sub>Cl<sub>3</sub>; Pale yellow crystal needles; m.p.154°C from ethanol

**MS (M+1) [m/z]:** (325.9866 (100.0%), 327.9836 (95.9%), 329.9807 (30.6%), 326.9900 (10.8%), 328.9870 (10.4%), 330.9841 (3.3%), 331.9777 (3.3%), 326.9836 (1.1%), 328.9807 (1.1%).

**IR [cm<sup>-1</sup>]:** 1560 i 1372 (-NO<sub>2</sub>); 1102 (-C-N); 708 (C-Cl); 1027 (-N-O); 2961 (C<sub>sp3</sub>-H); 1080 (C-O<sub>(δ)</sub>); 1427 (C-O<sub>(ν)</sub>)

**<sup>1</sup>H NMR, ppm [J:Hz]** (500 MHz, CDCl<sub>3</sub>): δ 2.74 (s, 1H, CH<sub>3</sub>); 4.19 (d, 1H, CH-CCl<sub>3</sub>, J=7,79); 5.49 (dd, 1H, CH-NO<sub>2</sub>, J=4,47, J=7,79); 5.54 (d, 1H, CH-C<sub>(Py)</sub>, J=4,47); 7.33 (dd, 1H, CH<sub>(Py)</sub>); 7.65 (d, 1H, CH<sub>(Py)</sub>); 8.59 (s, 1H, CH<sub>(Py)</sub>); 8.65 (d, 1H, CH<sub>(Py)</sub>);

**<sup>13</sup>C NMR [ppm]** (125 MHz, CDCl<sub>3</sub>): δ 43,19 (CH<sub>3</sub>); 74,33 (CH-NO<sub>2</sub>); 88,77 (CH-CCl<sub>3</sub>); 94,58 (CCl<sub>3</sub>); 94,93 (CH-Py); 124,03 (CH<sub>(Py)</sub>); 127,13 (C<sub>(Py)</sub>); 135,07 (CH<sub>(Py)</sub>); 149,70 (CH<sub>(Py)</sub>); 151,32 (CH<sub>(Py)</sub>)

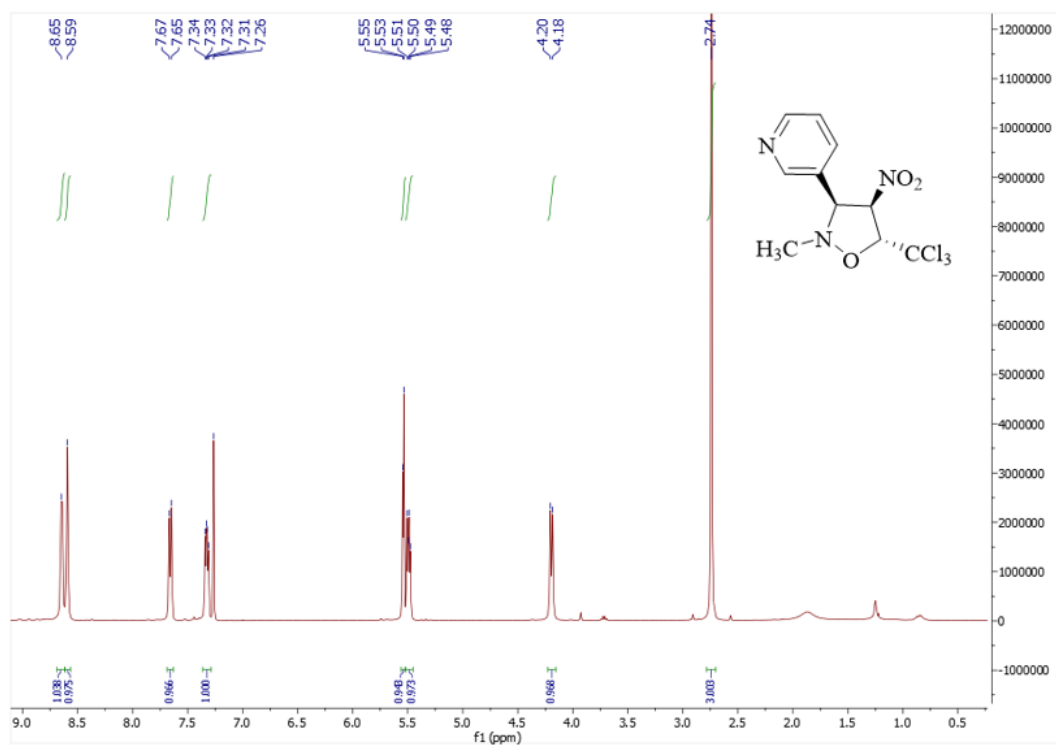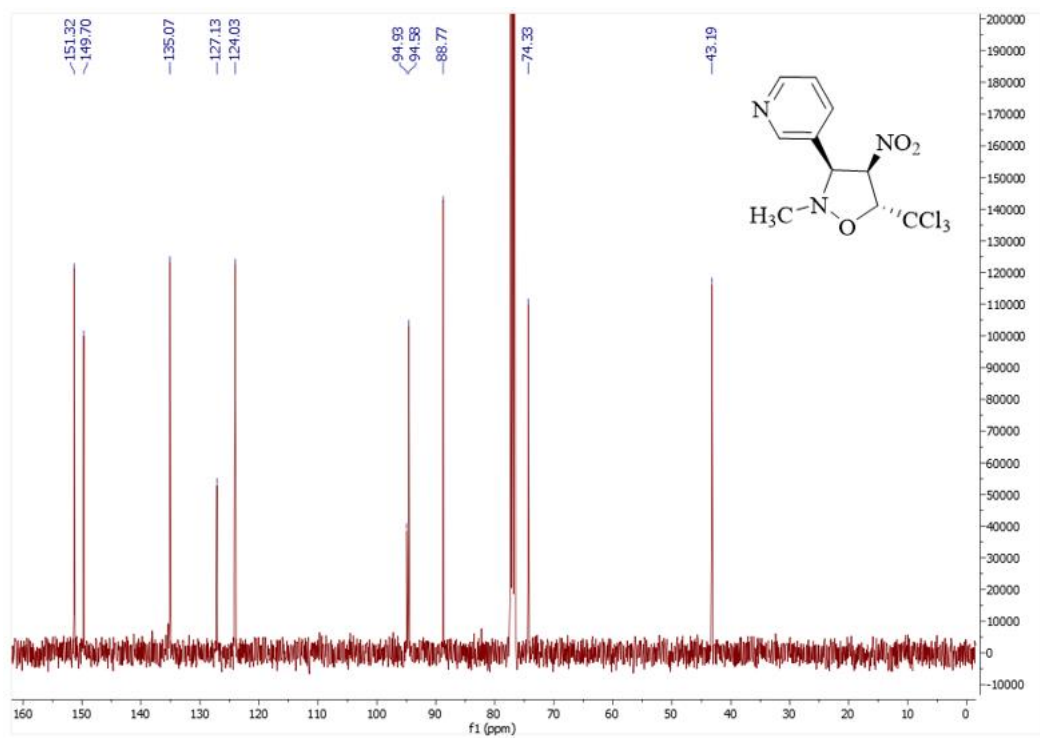

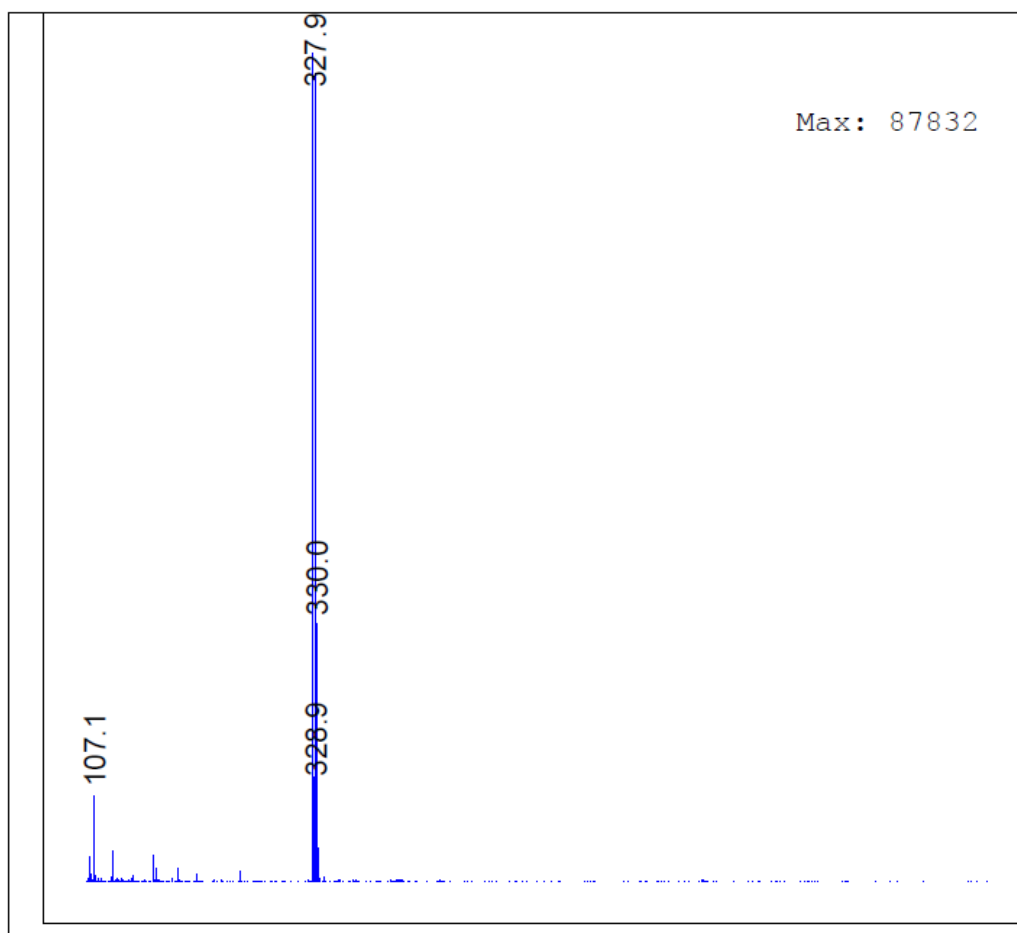

**[2.2] 3,4-cis-4,5-trans-2-methyl-3-(3-pyridyl)-4-nitro-5-tribromomethyl-1,2-oxazolidine 4b**

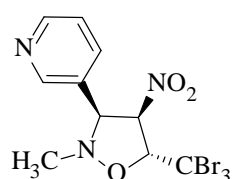

$C_{10}H_{10}N_3O_3Br_3$ ; Pale yellow crystal needles; m.p.168°C from ethanol

**MS (M+1) [m/z]:** (459.8330 (100.0%), 461.8310 (97.3%), 457.8351 (34.3%), 463.8289 (31.5%), 460.8364 (10.8%), 462.8343 (10.5%), 458.8384 (3.7%), 464.8323 (3.4%), 460.8300 (1.1%), 462.8280 (1.1%); m/z: 224.1035 (100.0%), 225.1069 (10.8%), 225.1006 (1.1%))

**IR [cm<sup>-1</sup>]:** 1559 i 1365 (-NO<sub>2</sub>); 1100 (-C-N); 547 (C-Br); 993 (-N-O); 2963 (C<sub>sp3</sub>-H); 1069 (C-O<sub>(δ)</sub>); 1425 (C-O<sub>(ν)</sub>)

**<sup>1</sup>H NMR, ppm [J:Hz]** (500 MHz, CDCl<sub>3</sub>): δ **2.75** (s, 1H, CH<sub>3</sub>); **4.27** (d, 1H, CH-CBr<sub>3</sub>, J=8,07); **5.40** (dd, 1H, CH-NO<sub>2</sub>, J=4,51, J=8,07); **5.54** (d, 1H, CH-C<sub>(Py)</sub>, J=4,51); **7.33** (dd, 1H, CH<sub>(Py)</sub>); **7.67** (d, 1H, CH<sub>(Py)</sub>); **8.60** (s, 1H, CH<sub>(Py)</sub>); **8.65** (d, 1H, CH<sub>(Py)</sub>)

**<sup>13</sup>C NMR [ppm]** (125 MHz, CDCl<sub>3</sub>) δ: **36,89** (CBr<sub>3</sub>); **43,29** (CH<sub>3</sub>); **74,62** (CH-NO<sub>2</sub>); **90,02** (C-CBr<sub>3</sub>); **95,72** (CH-Py); **124,06** (CH<sub>(Py)</sub>); **127,40** (C<sub>(Py)</sub>); **135,05** (CH<sub>(Py)</sub>); **149,70** (CH<sub>(Py)</sub>); **151,29** (CH<sub>(Py)</sub>)

**[2.3] 3,4-cis-4,5-trans-2-methyl-3-(3-pyridyl)-4-nitro-5-methylo-1,2-oxazolidine 4c**

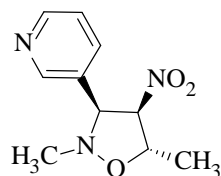

C<sub>10</sub>H<sub>13</sub>N<sub>3</sub>O<sub>3</sub>; Pale yellow semisolid

**MS (M+1) [m/z]:** 224.1

**IR [cm<sup>-1</sup>]:** **1549** i **1372** (-NO<sub>2</sub>); **1104** (-C-N); **2979**

(C<sub>sp3</sub>-H); **1054** (C-O<sub>(δ)</sub>); **1428** (C-O<sub>(ν)</sub>)

**<sup>1</sup>H NMR, ppm [J:Hz]** (500 MHz, CDCl<sub>3</sub>): δ **1,38** (d, 3H, C-CH<sub>3</sub>, J=6,31); **2.49** (s, 3H, N-CH<sub>3</sub>); **4.21** (d, 1H, CH-C<sub>3Py</sub>, J=8,09); **4.74** (dq, 1H, CH-CH<sub>3</sub>, J=6,31, J=5,23); **5.46** (dd, 1H, CH-NO<sub>2</sub>, J=5,23, J=8,09); **7.88** (d, 1H, H<sub>(Py)</sub>); **7.37** (dd, 1H, H<sub>(Py)</sub>); **8.53** (d, 1H, H<sub>(Py)</sub>); **8.63** (s, 1H, H<sub>(Py)</sub>)

**<sup>13</sup>C NMR [ppm]** (125 MHz, CDCl<sub>3</sub>): δ **17,28** (C-CH<sub>3</sub>); **42,55** (N-CH<sub>3</sub>); **97,03** (CH-NO<sub>2</sub>); **76,09** (C-CH<sub>3</sub>); **74,94** (CH-Py); **123,56** (CH<sub>(Py)</sub>); **135,96** (C<sub>(Py)</sub>); **135,13** (CH<sub>(Py)</sub>); **149,43** (CH<sub>(Py)</sub>); **149,72** (CH<sub>(Py)</sub>)

### [3] Quantum-chemical calculations

*Cartesian coordinates are in Å*

3,3,3-trichloro-1-nitropropene **2a**

E = -1701.175501 a. u.

|    |             |             |             |
|----|-------------|-------------|-------------|
| C  | 1.46397000  | -0.43850900 | 0.00010600  |
| C  | 0.44756100  | 0.40309900  | -0.00021800 |
| H  | 1.43151400  | -1.51698500 | 0.00044000  |
| H  | 0.63238600  | 1.47188500  | -0.00052800 |
| N  | 2.83199600  | 0.08476600  | -0.00003700 |
| O  | 3.71055600  | -0.75352200 | -0.00005700 |
| O  | 3.00391500  | 1.28574500  | -0.00012100 |
| C  | -0.99918300 | 0.01834700  | -0.00009000 |
| Cl | -1.75108600 | 0.73223900  | 1.45886000  |
| Cl | -1.75129600 | 0.73134000  | -1.45919100 |
| Cl | -1.26689600 | -1.74026600 | 0.00050700  |

C-3-Pirydy-N-methylnitone **1**

E = -456.159917 a. u.

|   |            |             |             |
|---|------------|-------------|-------------|
| C | 0.32120000 | -0.29401300 | -0.00000300 |
| C | 0.76990000 | 1.03247900  | -0.00000700 |
| C | 2.13742500 | 1.26835400  | -0.00001000 |
| C | 3.01214500 | 0.19192100  | -0.00001000 |
| C | 1.30050500 | -1.30074100 | -0.00000400 |
| H | 0.05328000 | 1.84023200  | -0.00001200 |
| H | 2.52138300 | 2.28198500  | -0.00000900 |

|   |             |             |             |
|---|-------------|-------------|-------------|
| H | 4.08710800  | 0.34943500  | -0.00001200 |
| H | 0.99645400  | -2.34618300 | -0.00000400 |
| C | -1.06431000 | -0.72112000 | 0.00001300  |
| H | -1.27576100 | -1.78163100 | 0.00002600  |
| C | -3.46027900 | -0.51213700 | 0.00002200  |
| H | -3.96888200 | -0.14116900 | 0.88815200  |
| H | -3.96885500 | -0.14128200 | -0.88817100 |
| H | -3.42863400 | -1.59965300 | 0.00009100  |
| N | -2.10601600 | 0.06642500  | 0.00001200  |
| O | -2.07771900 | 1.33172200  | -0.00001000 |
| N | 2.60689400  | -1.08127700 | -0.00001000 |

## TS

E = -2157.324987 a. u.

|   |             |             |             |
|---|-------------|-------------|-------------|
| C | -2.34176000 | -0.76359000 | 0.00367900  |
| C | -2.29902800 | -0.54229300 | 1.38491700  |
| C | -3.37399200 | 0.08655400  | 1.98181600  |
| C | -4.43932900 | 0.49690500  | 1.18631700  |
| C | -3.46826500 | -0.31498100 | -0.69648100 |
| H | -1.44389400 | -0.85995700 | 1.96674500  |
| H | -3.38596900 | 0.27369100  | 3.04860900  |
| H | -5.29014500 | 1.00703500  | 1.62869900  |
| H | -3.53605400 | -0.46816400 | -1.77094200 |
| C | -1.32505200 | -1.46021900 | -0.76239300 |
| H | -1.62258600 | -1.83536200 | -1.73685000 |
| C | 0.59716200  | -2.86885600 | -1.13580100 |
| H | -0.03309200 | -3.65969300 | -1.53830900 |



|    |             |             |             |
|----|-------------|-------------|-------------|
| H  | 1.05689300  | -2.30056600 | -1.94728000 |
| H  | 1.37054300  | -3.29840400 | -0.50527400 |
| N  | -0.21243800 | -1.98839400 | -0.29947200 |
| O  | 0.42047100  | -1.35511600 | 0.66778000  |
| C  | 0.18595700  | 0.52020600  | -1.08825500 |
| C  | 0.78776800  | 0.25677600  | 0.15534600  |
| H  | 0.63522600  | 0.30719700  | -2.04590000 |
| H  | 0.32942100  | 0.81162400  | 0.96810200  |
| N  | -0.86040200 | 1.46417300  | -1.16289100 |
| O  | -1.32842700 | 1.69592400  | -2.27505500 |
| O  | -1.28926800 | 1.98311500  | -0.13484400 |
| C  | 2.30150700  | 0.30189400  | 0.30321400  |
| Cl | 2.78589100  | 2.02344800  | 0.16884800  |
| Cl | 2.80855300  | -0.29330300 | 1.90989000  |
| Cl | 3.15453100  | -0.62935800 | -0.95988300 |
| N  | -4.49643800 | 0.30185900  | -0.12982800 |

3,4-cis-4,5-trans-2-methyl-3-(3-pyridyl)-4-nitro-5-trichloromethyl-1,2-oxazolidine **4a**

E = -2157.383201 a. u.

|   |            |             |             |
|---|------------|-------------|-------------|
| C | 2.33092300 | 0.48985000  | -0.20921000 |
| C | 2.47357500 | 0.98141100  | 1.08451500  |
| C | 3.64114500 | 0.70151900  | 1.77604900  |
| C | 4.62375800 | -0.05505100 | 1.14854100  |
| C | 3.38266000 | -0.24853600 | -0.74562600 |
| H | 1.68795500 | 1.57896700  | 1.53270700  |
| H | 3.79260300 | 1.06544300  | 2.78543900  |
| H | 5.55019500 | -0.29227400 | 1.66413100  |

|      |             |             |             |
|------|-------------|-------------|-------------|
| H    | 3.31548000  | -0.63740100 | -1.75998300 |
| C    | 1.08875900  | 0.73473400  | -1.03536100 |
| H    | 1.36198100  | 0.81927700  | -2.08811000 |
| C    | -0.37226800 | 2.57632100  | -1.70501400 |
| H    | -0.98375800 | 1.88762500  | -2.30008200 |
| H    | -1.01686500 | 3.33433900  | -1.26395600 |
| H    | 0.34904900  | 3.07173500  | -2.35678700 |
| N    | 0.38202700  | 1.94141900  | -0.63238700 |
| O    | -0.51212200 | 1.52792900  | 0.41191900  |
| C    | -0.00511200 | -0.36372200 | -0.87289000 |
| C    | -0.75966300 | 0.13412700  | 0.35137300  |
| H    | -0.62172800 | -0.43014800 | -1.76655600 |
| H    | -0.34996900 | -0.34151000 | 1.24660700  |
| N    | 0.61268600  | -1.72036100 | -0.72288900 |
| O    | 0.90157900  | -2.27130400 | -1.76434100 |
| O    | 0.83497300  | -2.14780500 | 0.38616200  |
| C    | -2.27622100 | -0.14401600 | 0.38052800  |
| Cl   | -2.52686700 | -1.91231600 | 0.34251500  |
| Cl   | -2.94021100 | 0.51306700  | 1.89761200  |
| Cl   | -3.13146500 | 0.59585100  | -0.99669400 |
| N    | 4.50950200  | -0.52229700 | -0.09316700 |
| .... |             |             |             |

| Structures | 1    | 2a   | MC     | P1    | P2    | P3    | P4    | P5    | P6    | P7<br>TS | P8    | P9    | P10   | P11   | PR    |
|------------|------|------|--------|-------|-------|-------|-------|-------|-------|----------|-------|-------|-------|-------|-------|
| Phases     |      |      | I      | II    | III   | IV    | V     | VI    | VII   | VIII     | IX    | X     | XI    | XII   |       |
| d1(C10-O8) |      |      | 3.060  | 2.303 | 2.142 | 2.078 | 1.877 | 1.850 | 1.789 | 1.730    | 1.658 | 1.627 | 1.533 | 1.459 | 1.416 |
| d2(C9-C5)  |      |      | 3.323  | 2.929 | 2.816 | 2.774 | 2.637 | 2.617 | 2.567 | 2.511    | 2.421 | 2.372 | 2.143 | 1.793 | 1.558 |
| IRC        |      |      | -14.75 | -4.32 | -2.89 | -2.40 | -1.02 | -0.84 | -0.42 | 0.00     | 0.60  | 0.90  | 2.16  | 3.96  |       |
| GEDT       |      |      | 0.02   | 0.12  | 0.17  | 0.19  | 0.24  | 0.24  | 0.25  | 0.25     | 0.22  | 0.20  | 0.07  | -0.12 |       |
| dE         |      |      | -3.4   | 3.7   | 6.6   | 7.7   | 11.0  | 11.4  | 11.9  | 12.1     | 11.5  | 10.8  | 4.5   | -12.2 | -30.0 |
| V(O1)      | 2.91 |      | 2.92   | 2.87  | 2.88  | 2.88  | 2.91  | 2.92  | 2.97  | 2.80     | 2.59  | 2.60  | 2.54  | 2.53  | 2.47  |
| V'(O1)     | 2.99 |      | 3.02   | 3.02  | 3.00  | 2.97  | 2.91  | 2.90  | 2.86  | 3.22     | 2.72  | 2.69  | 2.59  | 2.52  | 2.57  |
| V(N2,O1)   | 1.44 |      | 1.43   | 1.38  | 1.35  | 1.34  | 1.26  | 1.24  | 1.21  | 1.18     | 1.14  | 1.12  | 1.05  | 1.00  | 0.94  |
| V(C3,N2)   | 3.78 |      | 3.74   | 3.77  | 3.79  | 3.81  | 3.92  | 3.05  | 2.90  | 2.79     | 2.66  | 2.50  | 2.22  | 1.96  | 1.84  |
| V(C6,N2)   | 2.00 |      | 2.00   | 1.99  | 1.99  | 1.98  | 1.94  | 1.93  | 1.92  | 1.89     | 1.88  | 1.86  | 1.87  | 1.88  | 1.87  |
| V(C7,C3)   | 2.34 |      | 2.37   | 2.38  | 2.38  | 2.38  | 2.40  | 2.40  | 2.41  | 2.41     | 2.42  | 2.40  | 2.28  | 2.15  | 2.09  |
| V(C7,C8)   | 2.82 |      | 2.79   | 2.81  | 2.81  | 2.81  | 2.82  | 2.82  | 2.83  | 2.83     | 2.83  | 2.84  | 2.88  | 2.94  | 2.94  |
| V(C7,C12)  | 2.71 |      | 2.70   | 2.69  | 2.68  | 2.68  | 2.67  | 2.67  | 2.66  | 2.66     | 2.66  | 2.66  | 2.68  | 2.71  | 2.76  |
| V(C4,C5)   |      | 1.75 | 1.75   | 1.78  | 1.78  | 3.48  | 3.09  | 3.07  | 2.88  | 2.71     | 2.53  | 2.45  | 2.26  | 2.10  | 2.03  |
| V'(C4,C5)  |      | 1.80 | 1.77   | 1.71  | 1.72  |       |       |       |       |          |       |       |       |       |       |
| V(C4,N13)  |      | 2.28 | 2.32   | 2.44  | 2.52  | 2.58  | 2.62  | 2.63  | 2.64  | 2.65     | 2.65  | 2.62  | 2.57  | 2.25  | 2.22  |
| V(N13)     |      | 0.18 | 0.17   | 0.06  |       |       |       |       |       |          |       |       |       | 0.28  | 0.22  |
| V'(N13)    |      | 0.18 | 0.03   |       |       |       |       |       |       |          |       |       |       |       |       |
| V(O1,C5)   |      |      |        |       |       |       |       |       |       |          | 0.76  | 0.80  | 1.05  | 1.21  | 1.29  |
| V(C3,C4)   |      |      |        |       |       |       |       |       |       |          |       |       | 1.26  | 1.64  | 1.88  |
| V(N2)      |      |      |        |       |       |       |       | 0.90  | 1.10  | 1.28     | 1.49  | 1.60  | 1.92  | 2.20  | 2.31  |
| V(C3)      |      |      |        |       |       |       |       |       |       |          |       | 0.12  |       |       |       |
| V(C4)      |      |      |        |       |       |       | 0.44  | 0.47  | 0.56  | 0.63     | 0.73  | 0.78  |       |       |       |
| V(C5)      |      |      |        |       |       |       |       |       | 0.07  |          |       |       |       |       |       |

**Table S1.** ELF valence basins populations, distances of the forming bonds, relative electronic energies, GEDT and IRC values of the IRC structures, MC-P11, defining twelve phases characterizing the molecular mechanism of the [3+2] cycloaddition reaction of nitrone 1 and 3,3,3-trichloro-1-nitropropene 2a. Distances are given in angstroms, Å, GEDT values, and electron populations in an average number of electrons, e, relative energies in kcal mol<sup>-1</sup> and IRC values in a.
